# Supplementary material for: Polydopamine modification of silk fibroin membranes significantly promotes their wound healing effect
Source: Royal Society of Chemistry journal article supplement (doi:10.1039/c9bm00974d), 2019-01-01
Supplement: c9bm00974d1.pdf [file c9bm00974d1.pdf]

## Polydopamine modification of silk fibroin membranes significantly promotes their wound healing effect

### Supplementary Material

Table S1 Survey-wide XPS spectrum measurement result of the ESF and PESF membrane after being washed by water for 7 days.

| Surface composition | C1s(%) | N1s(%) | O1s(%) | N/C   |
|---------------------|--------|--------|--------|-------|
| ESF                 | 75.56  | 18.41  | 6.03   | 0.244 |
| PESF                | 77.58  | 14.75  | 7.76   | 0.190 |

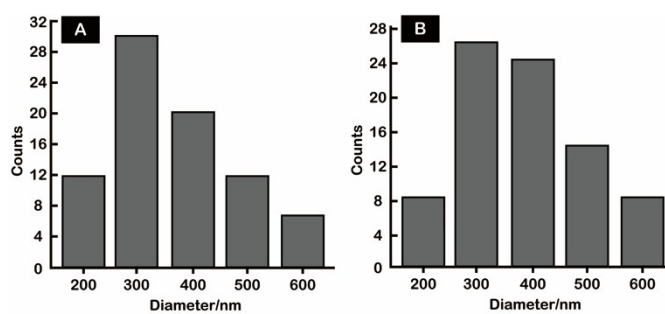

Figure S1 The diameter distribution of ESF (A, N=80 Mean= 437.1±130.9) and PESF membrane (B, N=80 Mean= 447.6±108.2).

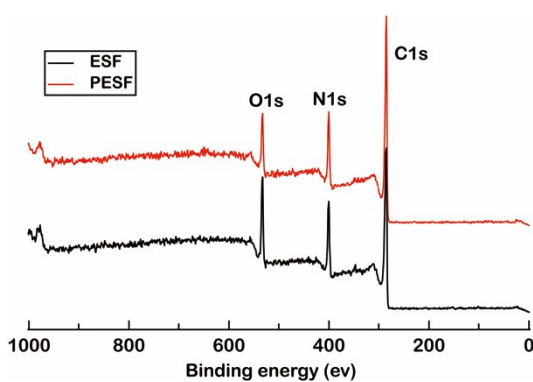

Figure S2 XPS spectra of the ESF and PESF membrane.

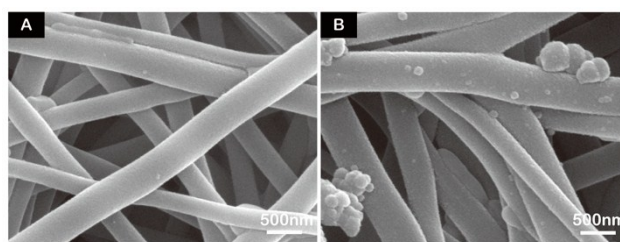

Figure S3 Morphology of the ESF (A) and PESF membrane (B) after being washed by water for 7 days.

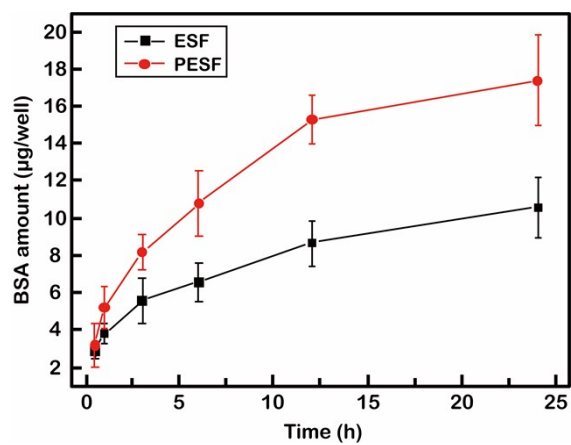

Figure S4 Immobilization of BSA on the ESF and PESF membrane.
